# Supplementary material for: Constraining PERMANOVA and LDM to within-set comparisons by projection improves the efficiency of analyses of matched sets of microbiome data
Source: PubMed Central journal article supplement (PMC8191060; doi:10.1186/s40168-021-01034-9), 2021-06-09
Supplement: 40168_2021_1034_MOESM1_ESM.pdf [file 40168_2021_1034_MOESM1_ESM.pdf]

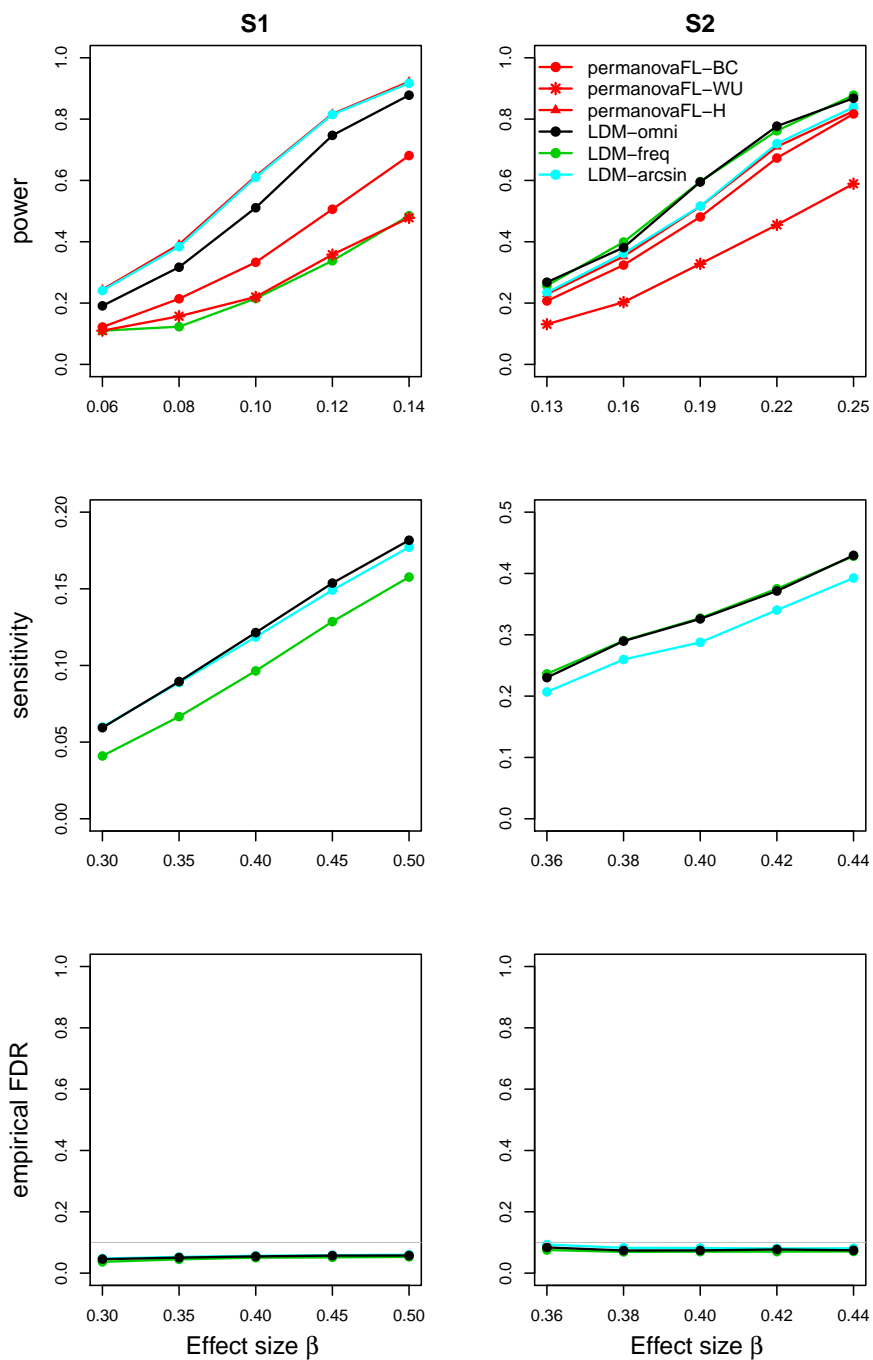

**Fig S1.** Simulation results for the matched-pair data of scenario (1). The LDM on frequency scale (freq), arcsin-root transformed frequency scale (arcsin), and the omnibus test (omni) are shown. permanovaFL based on the Bray-Curtis (BC), weighted UniFrac (WU), and Hellinger (H) distances are shown. All methods adopted the proposed strategy.
